# Supplementary material for: Relationship between Coffee, Tea, and Carbonated Beverages and Cardiovascular Risk Factors
Source: MDPI journal article supplement (doi:10.3390/nu15040934), 2023-02-13
Supplement: s1 [file s1]

**Table S1.** General characteristics of the participants by sex

|                                              | Total (n = 42613) | Men (n = 17311) | Women (n = 25302) | p value |
|----------------------------------------------|-------------------|-----------------|-------------------|---------|
| Age, years                                   | 41.87±0.13        | 41.34±0.15      | 42.39±0.15        | <0.001  |
| Coffee intake                                |                   |                 |                   | <0.001  |
| <1 time/week                                 | 7750 (18.19)      | 2575 (14.87)    | 5175 (20.45)      |         |
| 1 time/week ~ <1 time/day                    | 7605 (17.85)      | 2948 (17.03)    | 4657 (18.41)      |         |
| ≥1 time/day                                  | 27258 (63.97)     | 11788 (68.10)   | 15470 (61.14)     |         |
| Tea intake                                   |                   |                 |                   | <0.001  |
| <1 time/week                                 | 28952 (67.94)     | 11270 (65.10)   | 17682 (69.88)     |         |
| 1 time/week ~ <1 time/day                    | 9318 (21.87)      | 4000 (23.11)    | 5318 (21.02)      |         |
| ≥1 time/day                                  | 4343 (10.19)      | 2041 (11.79)    | 2302 (9.10)       |         |
| Carbonated beverage intake                   |                   |                 |                   | <0.001  |
| <1 time/week                                 | 31995 (75.08)     | 11486 (66.35)   | 20509 (81.06)     |         |
| 1 time/week ~ <1 time/day                    | 9876 (23.18)      | 5364 (30.99)    | 4512 (17.83)      |         |
| ≥1 time/day                                  | 742 (1.74)        | 461 (2.66)      | 281 (1.11)        |         |
| Nutritional intake                           |                   |                 |                   |         |
| Total energy intake, kcal/day                | 2,043.14±6.02     | 2,371.05±8.89   | 1,717.84±5.57     | <0.001  |
| Carbohydrates, % of energy                   | 63.46±0.11        | 60.88±0.15      | 66.02±0.12        | <0.001  |
| Protein, % of energy                         | 14.36±0.03        | 14.48±0.04      | 14.25±0.04        | <0.001  |
| Fat, % of energy                             | 19.12±0.07        | 19.27±0.09      | 18.98±0.09        | 0.007   |
| Average monthly household income, 10,000 KRW | 381.10±3.28       | 385.12±3.81     | 377.09±3.42       | 0.009   |
| Education                                    |                   |                 |                   | <0.001  |
| ≤Elementary school                           | 7896 (20.24)      | 2271 (14.70)    | 5625 (23.88)      |         |
| Middle school                                | 3942 (10.11)      | 1666 (10.78)    | 2276 (9.66)       |         |
| High school                                  | 14184 (36.36)     | 5834 (37.75)    | 8350 (35.45)      |         |
| ≥College                                     | 12985 (33.29)     | 5683 (36.77)    | 7302 (31.00)      |         |
| Smoking                                      |                   |                 |                   | <0.001  |
| None                                         | 25581 (64.94)     | 3959 (25.33)    | 21622 (91.00)     |         |
| Past                                         | 6301 (16.00)      | 5353 (34.25)    | 948 (3.99)        |         |
| Current                                      | 7508 (19.06)      | 6318 (40.42)    | 1190 (5.01)       |         |
| Alcohol drinking                             |                   |                 |                   | <0.001  |
| <1 time/month                                | 17950 (45.63)     | 4096 (26.24)    | 13854 (58.39)     |         |
| ≥1 time/month                                | 21386 (54.37)     | 11512 (73.76)   | 9874 (41.61)      |         |
| Walking                                      |                   |                 |                   | <0.001  |
| <30 minute * 5 days/week                     | 22786 (58.51)     | 8636 (55.93)    | 14150 (60.19)     |         |
| ≥30 minute * 5 days/week                     | 16161 (41.49)     | 6804 (44.07)    | 9357 (39.81)      |         |
| Body mass index                              |                   |                 |                   | <0.001  |
| <25 kg/m <sup>2</sup>                        | 27414 (68.51)     | 10012 (62.83)   | 17402 (72.27)     |         |

|                       |               |              |              |        |
|-----------------------|---------------|--------------|--------------|--------|
| ≥25 kg/m <sup>2</sup> | 12599 (31.49) | 5923 (37.17) | 6676 (27.73) |        |
| Hypertension          | 6773 (37.25)  | 2934 (39.73) | 3839 (35.56) | <0.001 |
| Diabetes              | 2494 (16.93)  | 1213 (20.19) | 1281 (14.69) | <0.001 |
| Dyslipidemia          | 3570 (23.57)  | 1361 (22.79) | 2209 (24.08) | 0.067  |
| Metabolic syndrome    | 8706 (21.70)  | 4123 (25.79) | 4583 (18.99) | <0.001 |

KRW: Korea republic won.

Data are presented as mean ± standard error for continuous variables (linear regression) and as numbers (%) for categorical variables ( $\chi^2$  test).

**Tables S2.** General characteristics of men by the frequency of intake of coffee

|                                              | <1 time/week (n = 2575) | 1 time/week ~ <1 time/day (n = 2948) | ≥1 time/day (n = 11788) | p value |
|----------------------------------------------|-------------------------|--------------------------------------|-------------------------|---------|
| Age, years                                   | 38.18±0.39              | 35.59±0.30                           | 43.74±0.17              | <0.001  |
| Tea intake                                   |                         |                                      |                         | <0.001  |
| <1 time/week                                 | 1894 (73.55)            | 1561 (52.95)                         | 7815 (66.30)            |         |
| 1 time/week ~ <1 time/day                    | 471 (18.29)             | 1207 (40.94)                         | 2322 (19.70)            |         |
| ≥1 time/day                                  | 210 (8.16)              | 180 (6.11)                           | 1651 (14.01)            |         |
| Carbonated beverage intake                   |                         |                                      |                         | <0.001  |
| <1 time/week                                 | 1876 (72.85)            | 1649 (55.94)                         | 7961 (67.53)            |         |
| 1 time/week ~ <1 time/day                    | 638 (24.78)             | 1222 (41.45)                         | 3504 (29.73)            |         |
| ≥1 time/day                                  | 61 (2.37)               | 77 (2.61)                            | 323 (2.74)              |         |
| Nutritional intake                           |                         |                                      |                         |         |
| Total energy intake, kcal/day                | 2,270.07±21.94          | 2,343.02±19.32                       | 2,403.05±10.31          | <0.001  |
| Carbohydrates, % of energy                   | 61.13±0.39              | 59.15±0.33                           | 61.32±0.17              | 0.024   |
| Protein, % of energy                         | 14.58±0.11              | 15.03±0.11                           | 14.30±0.05              | <0.001  |
| Fat, % of energy                             | 19.20±0.25              | 20.75±0.22                           | 18.85±0.10              | <0.001  |
| Average monthly household income, 10,000 KRW | 346.35±7.46             | 404.09±7.90                          | 388.75±4.06             | <0.001  |
| Education                                    |                         |                                      |                         | <0.001  |
| ≤Elementary school                           | 426 (18.30)             | 353 (13.28)                          | 1492 (14.25)            |         |
| Middle school                                | 223 (9.58)              | 212 (7.97)                           | 1231 (11.76)            |         |
| High school                                  | 940 (40.38)             | 1185 (44.57)                         | 3709 (35.44)            |         |
| ≥College                                     | 739 (31.74)             | 909 (34.19)                          | 4035 (38.55)            |         |
| Smoking                                      |                         |                                      |                         | <0.001  |
| None                                         | 968 (41.31)             | 998 (37.20)                          | 1993 (18.79)            |         |
| Past                                         | 788 (33.63)             | 853 (31.79)                          | 3712 (35.01)            |         |
| Current                                      | 587 (25.05)             | 832 (31.01)                          | 4899 (46.20)            |         |
| Alcohol drinking                             |                         |                                      |                         | <0.001  |
| <1 time/month                                | 757 (32.31)             | 648 (24.17)                          | 2691 (25.43)            |         |
| ≥1 time/month                                | 1586 (67.69)            | 2033 (75.83)                         | 7893 (74.57)            |         |
| Walking                                      |                         |                                      |                         | <0.001  |
| <30 minute * 5 days/week                     | 1263 (54.28)            | 1374 (51.69)                         | 5999 (57.38)            |         |
| ≥30 minute * 5 days/week                     | 1064 (45.72)            | 1284 (48.31)                         | 4456 (42.62)            |         |
| Body mass index                              |                         |                                      |                         | <0.001  |
| <25 kg/m <sup>2</sup>                        | 1633 (68.50)            | 1736 (63.59)                         | 6643 (61.39)            |         |
| ≥25 kg/m <sup>2</sup>                        | 751 (31.50)             | 994 (36.41)                          | 4178 (38.61)            |         |
| Hypertension                                 | 454 (43.53)             | 433 (29.76)                          | 2047 (41.89)            | <0.001  |
| Diabetes                                     | 197 (23.68)             | 186 (14.86)                          | 830 (21.15)             | <0.001  |
| Dyslipidemia                                 | 193 (24.16)             | 185 (15.02)                          | 983 (24.94)             | <0.001  |

|                    |             |             |              |        |
|--------------------|-------------|-------------|--------------|--------|
| Metabolic syndrome | 534 (22.34) | 587 (21.41) | 3002 (27.66) | <0.001 |
|--------------------|-------------|-------------|--------------|--------|

KRW: Korea republic won.

Data are presented as mean  $\pm$  standard error for continuous variables (linear regression) and as numbers (%) for categorical variables ( $\chi^2$  test).

**Tables S3.** General characteristics of women by the frequency of intake of coffee

|                                              | <1 time/week (n = 5175) | 1 time/week ~ <1 time/day (n = 4657) | ≥1 time/day (n = 15470) | p value |
|----------------------------------------------|-------------------------|--------------------------------------|-------------------------|---------|
| Age, years                                   | 42.48±0.32              | 37.59±0.28                           | 43.95±0.16              | <0.001  |
| Tea intake                                   |                         |                                      |                         | <0.001  |
| <1 time/week                                 | 4193 (81.02)            | 2791 (59.93)                         | 10698 (69.15)           |         |
| 1 time/week ~ <1 time/day                    | 735 (14.20)             | 1642 (35.26)                         | 2941 (19.01)            |         |
| ≥1 time/day                                  | 247 (4.77)              | 224 (4.81)                           | 1831 (11.84)            |         |
| Carbonated beverage intake                   |                         |                                      |                         | <0.001  |
| <1 time/week                                 | 4434 (85.68)            | 3416 (73.35)                         | 12659 (81.83)           |         |
| 1 time/week ~ <1 time/day                    | 690 (13.33)             | 1189 (25.53)                         | 2633 (17.02)            |         |
| ≥1 time/day                                  | 51 (0.99)               | 52 (1.12)                            | 178 (1.15)              |         |
| Nutritional intake                           |                         |                                      |                         |         |
| Total energy intake, kcal/day                | 1,707.91±12.63          | 1,703.48±12.05                       | 1,725.88±6.64           | 0.113   |
| Carbohydrates, % of energy                   | 67.58±0.24              | 64.21±0.25                           | 66.11±0.14              | 0.002   |
| Protein, % of energy                         | 14.14±0.07              | 14.47±0.08                           | 14.21±0.05              | 0.974   |
| Fat, % of energy                             | 17.88±0.18              | 20.34±0.19                           | 18.89±0.10              | 0.007   |
| Average monthly household income, 10,000 KRW | 326.74±5.06             | 399.68±5.82                          | 386.12±3.91             | <0.001  |
| Education                                    |                         |                                      |                         | <0.001  |
| ≤Elementary school                           | 1567 (32.52)            | 969 (22.30)                          | 3089 (21.47)            |         |
| Middle school                                | 426 (8.84)              | 343 (7.89)                           | 1507 (10.47)            |         |
| High school                                  | 1524 (31.63)            | 1649 (37.94)                         | 5177 (35.98)            |         |
| ≥College                                     | 1301 (27.00)            | 1385 (31.87)                         | 4616 (32.08)            |         |
| Smoking                                      |                         |                                      |                         | <0.001  |
| None                                         | 4501 (92.69)            | 4024 (91.77)                         | 13097 (90.21)           |         |
| Past                                         | 194 (4.00)              | 171 (3.90)                           | 583 (4.02)              |         |
| Current                                      | 161 (3.32)              | 190 (4.33)                           | 839 (5.78)              |         |
| Alcohol drinking                             |                         |                                      |                         | <0.001  |
| <1 time/month                                | 3510 (72.45)            | 2524 (57.61)                         | 7820 (53.92)            |         |
| ≥1 time/month                                | 1335 (27.55)            | 1857 (42.39)                         | 6682 (46.08)            |         |
| Walking                                      |                         |                                      |                         | 0.026   |
| <30 minute * 5 days/week                     | 2857 (59.38)            | 2554 (58.86)                         | 8739 (60.87)            |         |
| ≥30 minute * 5 days/week                     | 1954 (40.62)            | 1785 (41.14)                         | 5618 (39.13)            |         |
| Body mass index                              |                         |                                      |                         | <0.001  |
| <25 kg/m <sup>2</sup>                        | 3644 (74.02)            | 3274 (73.96)                         | 10484 (71.18)           |         |
| ≥25 kg/m <sup>2</sup>                        | 1279 (25.98)            | 1153 (26.04)                         | 4244 (28.82)            |         |
| Hypertension                                 | 995 (44.80)             | 650 (29.78)                          | 2194 (34.32)            | <0.001  |
| Diabetes                                     | 417 (24.46)             | 229 (12.41)                          | 635 (12.28)             | <0.001  |
| Dyslipidemia                                 | 502 (29.24)             | 358 (18.70)                          | 1349 (24.34)            | <0.001  |

|                    |              |              |              |        |
|--------------------|--------------|--------------|--------------|--------|
| Metabolic syndrome | 1082 (21.92) | 795 (17.91)  | 2706 (18.34) | <0.001 |
| Menopause          | 2501 (50.79) | 1674 (37.93) | 5765 (39.44) | <0.001 |

KRW: Korea republic won.

Data are presented as mean  $\pm$  standard error for continuous variables (linear regression) and as numbers (%) for categorical variables ( $\chi^2$  test).

**Tables S4.** General characteristics of men by the frequency of intake of tea

|                                              | <1 time/week (n = 11270) | 1 time/week ~ <1 time/day (n = 4000) | ≥1 time/day (n = 2041) | p value |
|----------------------------------------------|--------------------------|--------------------------------------|------------------------|---------|
| Age, years                                   | 42.49±0.19               | 38.10±0.25                           | 41.94±0.32             | <0.001  |
| Coffee intake                                |                          |                                      |                        | <0.001  |
| <1 time/week                                 | 1894 (16.81)             | 471 (11.77)                          | 210 (10.29)            |         |
| 1 time/week ~ <1 time/day                    | 1561 (13.85)             | 1207 (30.18)                         | 180 (8.82)             |         |
| ≥1 time/day                                  | 7815 (69.34)             | 2322 (58.05)                         | 1651 (80.89)           |         |
| Carbonated beverage intake                   |                          |                                      |                        | <0.001  |
| <1 time/week                                 | 7902 (70.12)             | 2258 (56.45)                         | 1326 (64.97)           |         |
| 1 time/week ~ <1 time/day                    | 3064 (27.19)             | 1640 (41.00)                         | 660 (32.34)            |         |
| ≥1 time/day                                  | 304 (2.70)               | 102 (2.55)                           | 55 (2.69)              |         |
| Nutritional intake                           |                          |                                      |                        |         |
| Total energy intake, kcal/day                | 2,374.48±10.59           | 2,374.13±16.82                       | 2,346.37±24.97         | 0.381   |
| Carbohydrates, % of energy                   | 61.53±0.18               | 59.33±0.28                           | 60.66±0.42             | <0.001  |
| Protein, % of energy                         | 14.16±0.05               | 15.07±0.09                           | 14.96±0.13             | <0.001  |
| Fat, % of energy                             | 18.83±0.11               | 20.50±0.18                           | 19.02±0.24             | <0.001  |
| Average monthly household income, 10,000 KRW | 365.77±4.33              | 423.55±6.78                          | 408.14±7.71            | <0.001  |
| Education                                    |                          |                                      |                        | <0.001  |
| ≤Elementary school                           | 1887 (18.76)             | 275 (7.66)                           | 109 (6.04)             |         |
| Middle school                                | 1260 (12.53)             | 275 (7.66)                           | 131 (7.26)             |         |
| High school                                  | 3781 (37.59)             | 1445 (40.24)                         | 608 (33.68)            |         |
| ≥College                                     | 3130 (31.12)             | 1596 (44.44)                         | 957 (53.02)            |         |
| Smoking                                      |                          |                                      |                        | <0.001  |
| None                                         | 2363 (23.24)             | 1163 (32.01)                         | 433 (23.65)            |         |
| Past                                         | 3519 (34.62)             | 1141 (31.41)                         | 693 (37.85)            |         |
| Current                                      | 4284 (42.14)             | 1329 (36.58)                         | 705 (38.50)            |         |
| Alcohol drinking                             |                          |                                      |                        | <0.001  |
| <1 time/month                                | 2859 (28.16)             | 844 (23.25)                          | 393 (21.51)            |         |
| ≥1 time/month                                | 7292 (71.84)             | 2786 (76.75)                         | 1434 (78.49)           |         |
| Walking                                      |                          |                                      |                        | 0.007   |
| <30 minute * 5 days/week                     | 5714 (56.85)             | 1936 (54.05)                         | 986 (54.57)            |         |
| ≥30 minute * 5 days/week                     | 4337 (43.15)             | 1646 (45.95)                         | 821 (45.43)            |         |
| Body mass index                              |                          |                                      |                        | <0.001  |
| <25 kg/m <sup>2</sup>                        | 6779 (65.17)             | 2186 (59.29)                         | 1047 (56.72)           |         |
| ≥25 kg/m <sup>2</sup>                        | 3623 (34.83)             | 1501 (40.71)                         | 799 (43.28)            |         |
| Hypertension                                 | 2035 (40.15)             | 558 (33.14)                          | 341 (53.96)            | <0.001  |
| Diabetes                                     | 807 (19.63)              | 242 (17.10)                          | 164 (34.10)            | <0.001  |
| Dyslipidemia                                 | 886 (21.95)              | 284 (19.80)                          | 191 (38.05)            | <0.001  |

|                    |              |             |             |       |
|--------------------|--------------|-------------|-------------|-------|
| Metabolic syndrome | 2680 (25.69) | 906 (24.49) | 537 (28.96) | 0.001 |
|--------------------|--------------|-------------|-------------|-------|

---

KRW: Korea republic won.

Data are presented as mean  $\pm$  standard error for continuous variables (linear regression) and as numbers (%) for categorical variables ( $\chi^2$  test).



**Tables S5.** General characteristics of women by the frequency of intake of tea

|                                              | <1 time/week (n = 17682) | 1 time/week ~ <1 time/day (n = 5318) | ≥1 time/day (n = 2302) | p value |
|----------------------------------------------|--------------------------|--------------------------------------|------------------------|---------|
| Age, years                                   | 43.84±0.18               | 38.42±0.23                           | 41.30±0.35             | <0.001  |
| Coffee intake                                |                          |                                      |                        | <0.001  |
| <1 time/week                                 | 4193 (23.71)             | 735 (13.82)                          | 247 (10.73)            |         |
| 1 time/week ~ <1 time/day                    | 2791 (15.78)             | 1642 (30.88)                         | 224 (9.73)             |         |
| ≥1 time/day                                  | 10698 (60.50)            | 2941 (55.30)                         | 1831 (79.54)           |         |
| Carbonated beverage intake                   |                          |                                      |                        | <0.001  |
| <1 time/week                                 | 14755 (83.45)            | 3941 (74.11)                         | 1813 (78.76)           |         |
| 1 time/week ~ <1 time/day                    | 2750 (15.55)             | 1310 (24.63)                         | 452 (19.64)            |         |
| ≥1 time/day                                  | 177 (1.00)               | 67 (1.26)                            | 37 (1.61)              |         |
| Nutritional intake                           |                          |                                      |                        |         |
| Total energy intake, kcal/day                | 1,716.56±6.45            | 1,718.55±11.70                       | 1,725.50±18.85         | 0.656   |
| Carbohydrates, % of energy                   | 66.73±0.14               | 64.27±0.23                           | 65.11±0.33             | <0.001  |
| Protein, % of energy                         | 14.02±0.04               | 14.65±0.07                           | 14.96±0.12             | <0.001  |
| Fat, % of energy                             | 18.44±0.10               | 20.39±0.17                           | 19.53±0.24             | <0.001  |
| Average monthly household income, 10,000 KRW | 360.49±3.69              | 423.96±6.16                          | 385.86±7.70            | <0.001  |
| Education                                    |                          |                                      |                        | <0.001  |
| ≤Elementary school                           | 4658 (28.23)             | 676 (13.63)                          | 291 (13.91)            |         |
| Middle school                                | 1603 (9.72)              | 450 (9.07)                           | 223 (10.66)            |         |
| High school                                  | 5445 (33.00)             | 2027 (40.86)                         | 878 (41.97)            |         |
| ≥College                                     | 4794 (29.05)             | 1808 (36.44)                         | 700 (33.46)            |         |
| Smoking                                      |                          |                                      |                        | 0.029   |
| None                                         | 15109 (90.76)            | 4590 (91.71)                         | 1923 (91.27)           |         |
| Past                                         | 706 (4.24)               | 174 (3.48)                           | 68 (3.23)              |         |
| Current                                      | 833 (5.00)               | 241 (4.82)                           | 116 (5.51)             |         |
| Alcohol drinking                             |                          |                                      |                        | <0.001  |
| <1 time/month                                | 10168 (61.14)            | 2654 (53.13)                         | 1032 (49.10)           |         |
| ≥1 time/month                                | 6463 (38.86)             | 2341 (46.87)                         | 1070 (50.90)           |         |
| Walking                                      |                          |                                      |                        | <0.001  |
| <30 minute * 5 days/week                     | 10151 (61.62)            | 2852 (57.58)                         | 1147 (55.14)           |         |
| ≥30 minute * 5 days/week                     | 6323 (38.38)             | 2101 (42.42)                         | 933 (44.86)            |         |
| Body mass index                              |                          |                                      |                        | <0.001  |
| <25 kg/m <sup>2</sup>                        | 12094 (71.58)            | 3780 (74.94)                         | 1528 (71.44)           |         |
| ≥25 kg/m <sup>2</sup>                        | 4801 (28.42)             | 1264 (25.06)                         | 611 (28.56)            |         |
| Hypertension                                 | 2982 (36.08)             | 602 (30.73)                          | 255 (44.58)            | <0.001  |
| Diabetes                                     | 988 (14.77)              | 205 (12.67)                          | 88 (21.26)             | <0.001  |
| Dyslipidemia                                 | 1672 (23.99)             | 380 (21.99)                          | 157 (32.98)            | <0.001  |

|                    |              |              |             |        |
|--------------------|--------------|--------------|-------------|--------|
| Metabolic syndrome | 3442 (20.32) | 774 (15.31)  | 367 (17.13) | <0.001 |
| Menopause          | 7618 (45.52) | 1620 (32.05) | 702 (32.41) | <0.001 |

KRW: Korea republic won.

Data are presented as mean  $\pm$  standard error for continuous variables (linear regression) and as numbers (%) for categorical variables ( $\chi^2$  test).

**Tables S6.** General characteristics of men by the frequency of intake of carbonated beverages

|                                              | <1 time/week (n = 11486) | 1 time/week ~ <1 time/day (n = 5364) | ≥1 time/day (n = 461) | p value |
|----------------------------------------------|--------------------------|--------------------------------------|-----------------------|---------|
| Age, years                                   | 46.20±0.17               | 34.38±0.20                           | 30.64±0.48            | <0.001  |
| Coffee intake                                |                          |                                      |                       | <0.001  |
| <1 time/week                                 | 1876 (16.33)             | 638 (11.89)                          | 61 (13.23)            |         |
| 1 time/week ~ <1 time/day                    | 1649 (14.36)             | 1222 (22.78)                         | 77 (16.70)            |         |
| ≥1 time/day                                  | 7961 (69.31)             | 3504 (65.32)                         | 323 (70.07)           |         |
| Tea intake                                   |                          |                                      |                       | <0.001  |
| <1 time/week                                 | 7902 (68.80)             | 3064 (57.12)                         | 304 (65.94)           |         |
| 1 time/week ~ <1 time/day                    | 2258 (19.66)             | 1640 (30.57)                         | 102 (22.13)           |         |
| ≥1 time/day                                  | 1326 (11.54)             | 660 (12.30)                          | 55 (11.93)            |         |
| Nutritional intake                           |                          |                                      |                       |         |
| Total energy intake, kcal/day                | 2,317.01±10.43           | 2,443.38±14.77                       | 2,544.90±56.14        | <0.001  |
| Carbohydrates, % of energy                   | 62.20±0.19               | 58.86±0.22                           | 59.52±0.73            | <0.001  |
| Protein, % of energy                         | 14.31±0.05               | 14.77±0.07                           | 14.42±0.27            | <0.001  |
| Fat, % of energy                             | 17.75±0.10               | 21.44±0.15                           | 22.53±0.52            | <0.001  |
| Average monthly household income, 10,000 KRW | 375.90±4.18              | 397.93±5.77                          | 408.68±18.39          | <0.001  |
| Education                                    |                          |                                      |                       | <0.001  |
| ≤Elementary school                           | 1943 (18.74)             | 310 (6.60)                           | 18 (4.59)             |         |
| Middle school                                | 1332 (12.85)             | 315 (6.71)                           | 19 (4.85)             |         |
| High school                                  | 3521 (33.96)             | 2101 (44.76)                         | 212 (54.08)           |         |
| ≥College                                     | 3572 (34.45)             | 1968 (41.93)                         | 143 (36.48)           |         |
| Smoking                                      |                          |                                      |                       | <0.001  |
| None                                         | 2389 (22.80)             | 1458 (30.69)                         | 112 (27.86)           |         |
| Past                                         | 4167 (39.77)             | 1137 (23.94)                         | 49 (12.19)            |         |
| Current                                      | 3922 (37.43)             | 2155 (45.37)                         | 241 (59.95)           |         |
| Alcohol drinking                             |                          |                                      |                       | <0.001  |
| <1 time/month                                | 2861 (27.34)             | 1141 (24.06)                         | 94 (23.38)            |         |
| ≥1 time/month                                | 7603 (72.66)             | 3601 (75.94)                         | 308 (76.62)           |         |
| Walking                                      |                          |                                      |                       | 0.303   |
| <30 minute * 5 days/week                     | 5838 (56.32)             | 2590 (55.28)                         | 208 (53.47)           |         |
| ≥30 minute * 5 days/week                     | 4528 (43.68)             | 2095 (44.72)                         | 181 (46.53)           |         |
| Body mass index                              |                          |                                      |                       | 0.051   |
| <25 kg/m <sup>2</sup>                        | 6776 (63.48)             | 2985 (61.56)                         | 251 (60.92)           |         |
| ≥25 kg/m <sup>2</sup>                        | 3898 (36.52)             | 1864 (38.44)                         | 161 (39.08)           |         |
| Hypertension                                 | 2443 (48.78)             | 471 (21.51)                          | 20 (10.70)            | <0.001  |
| Diabetes                                     | 1057 (26.95)             | 146 (7.67)                           | 10 (5.49)             | <0.001  |
| Dyslipidemia                                 | 1097 (28.70)             | 247 (12.54)                          | 17 (9.34)             | <0.001  |

|                    |              |              |            |        |
|--------------------|--------------|--------------|------------|--------|
| Metabolic syndrome | 3008 (28.09) | 1034 (21.25) | 81 (19.66) | <0.001 |
|--------------------|--------------|--------------|------------|--------|

KRW: Korea republic won.

Data are presented as mean  $\pm$  standard error for continuous variables (linear regression) and as numbers (%) for categorical variables ( $\chi^2$  test).

**Tables S7.** General characteristics of women by the frequency of intake of carbonated beverages

|                                              | <1 time/week (n = 20509) | 1 time/week ~ <1 time/day (n = 4512) | ≥1 time/day (n = 281) | p value |
|----------------------------------------------|--------------------------|--------------------------------------|-----------------------|---------|
| Age, years                                   | 45.32±0.16               | 32.65±0.21                           | 30.56±0.78            | <0.001  |
| Coffee intake                                |                          |                                      |                       | <0.001  |
| <1 time/week                                 | 4434 (21.62)             | 690 (15.29)                          | 51 (18.15)            |         |
| 1 time/week ~ <1 time/day                    | 3416 (16.66)             | 1189 (26.35)                         | 52 (18.51)            |         |
| ≥1 time/day                                  | 12659 (61.72)            | 2633 (58.36)                         | 178 (63.35)           |         |
| Tea intake                                   |                          |                                      |                       | <0.001  |
| <1 time/week                                 | 14755 (71.94)            | 2750 (60.95)                         | 177 (62.99)           |         |
| 1 time/week ~ <1 time/day                    | 3941 (19.22)             | 1310 (29.03)                         | 67 (23.84)            |         |
| ≥1 time/day                                  | 1813 (8.84)              | 452 (10.02)                          | 37 (13.17)            |         |
| Nutritional intake                           |                          |                                      |                       |         |
| Total energy intake, kcal/day                | 1,694.68±6.10            | 1,791.10±12.73                       | 1,863.23±50.61        | <0.001  |
| Carbohydrates, % of energy                   | 67.26±0.13               | 61.93±0.23                           | 61.12±0.96            | <0.001  |
| Protein, % of energy                         | 14.21±0.04               | 14.43±0.08                           | 13.72±0.34            | 0.182   |
| Fat, % of energy                             | 18.01±0.10               | 22.28±0.18                           | 21.84±0.68            | <0.001  |
| Average monthly household income, 10,000 KRW | 370.45±3.62              | 399.79±5.79                          | 394.37±23.39          | <0.001  |
| Education                                    |                          |                                      |                       | <0.001  |
| ≤Elementary school                           | 5179 (27.03)             | 427 (10.29)                          | 19 (7.72)             |         |
| Middle school                                | 2007 (10.48)             | 257 (6.19)                           | 12 (4.88)             |         |
| High school                                  | 6433 (33.58)             | 1809 (43.60)                         | 108 (43.90)           |         |
| ≥College                                     | 5539 (28.91)             | 1656 (39.91)                         | 107 (43.50)           |         |
| Smoking                                      |                          |                                      |                       | <0.001  |
| None                                         | 17789 (92.01)            | 3640 (87.10)                         | 193 (77.82)           |         |
| Past                                         | 714 (3.69)               | 215 (5.14)                           | 19 (7.66)             |         |
| Current                                      | 830 (4.29)               | 324 (7.75)                           | 36 (14.52)            |         |
| Alcohol drinking                             |                          |                                      |                       | <0.001  |
| <1 time/month                                | 11819 (61.21)            | 1930 (46.25)                         | 105 (42.51)           |         |
| ≥1 time/month                                | 7489 (38.79)             | 2243 (53.75)                         | 142 (57.49)           |         |
| Walking                                      |                          |                                      |                       | 0.081   |
| <30 minute * 5 days/week                     | 11556 (60.41)            | 2463 (59.58)                         | 131 (53.91)           |         |
| ≥30 minute * 5 days/week                     | 7574 (39.59)             | 1671 (40.42)                         | 112 (46.09)           |         |
| Body mass index                              |                          |                                      |                       | 0.001   |
| <25 kg/m <sup>2</sup>                        | 14064 (71.76)            | 3147 (74.50)                         | 191 (75.20)           |         |
| ≥25 kg/m <sup>2</sup>                        | 5536 (28.24)             | 1077 (25.50)                         | 63 (24.80)            |         |
| Hypertension                                 | 3529 (39.89)             | 291 (15.86)                          | 19 (16.67)            | <0.001  |
| Diabetes                                     | 1183 (17.01)             | 89 (5.36)                            | 9 (8.65)              | <0.001  |
| Dyslipidemia                                 | 2039 (27.67)             | 156 (9.19)                           | 14 (13.08)            | <0.001  |

|                    |              |             |            |        |
|--------------------|--------------|-------------|------------|--------|
| Metabolic syndrome | 4001 (20.37) | 546 (12.90) | 36 (14.12) | <0.001 |
| Menopause          | 9137 (46.94) | 768 (18.13) | 35 (13.89) | <0.001 |

KRW: Korea republic won.

Data are presented as mean  $\pm$  standard error for continuous variables (linear regression) and as numbers (%) for categorical variables ( $\chi^2$  test).

**Tables S8.** Proportion of age groups by the frequency of intake of coffee, tea, and carbonated beverages

| Coffee intake             | Tea intake                | Carbonated beverage intake | 10s            | 20s            | 30s             | 40s             | 50s             | 60s             | 70s            | ≥80s          | Total             |
|---------------------------|---------------------------|----------------------------|----------------|----------------|-----------------|-----------------|-----------------|-----------------|----------------|---------------|-------------------|
| <1 time/week              | <1 time/week              | <1 time/week               | 105<br>(2.10)  | 670<br>(13.40) | 827<br>(16.54)  | 583<br>(11.66)  | 991<br>(19.82)  | 958<br>(19.16)  | 689<br>(13.78) | 177<br>(3.54) | 5000<br>(100.00)  |
| 1 time/week ~ <1 time/day | <1 time/week              | <1 time/week               | 37<br>(1.18)   | 357<br>(11.37) | 541<br>(17.22)  | 466<br>(14.84)  | 685<br>(21.81)  | 622<br>(19.80)  | 360<br>(11.46) | 73<br>(2.32)  | 3141<br>(100.00)  |
| <1 time/week              | 1 time/week ~ <1 time/day | <1 time/week               | 7 (0.74)       | 133<br>(14.07) | 160<br>(16.93)  | 170<br>(17.99)  | 201<br>(21.27)  | 177<br>(18.73)  | 87<br>(9.21)   | 10<br>(1.06)  | 945<br>(100.00)   |
| <1 time/week              | <1 time/week              | 1 time/week ~ <1 time/day  | 106<br>(10.59) | 457<br>(45.65) | 220<br>(21.98)  | 75 (7.49)       | 53 (5.29)       | 45 (4.50)       | 33<br>(3.30)   | 12<br>(1.20)  | 1001<br>(100.00)  |
| 1 time/week ~ <1 time/day | 1 time/week ~ <1 time/day | <1 time/week               | 26<br>(1.55)   | 401<br>(23.93) | 282<br>(16.83)  | 299<br>(17.84)  | 308<br>(18.38)  | 251<br>(14.98)  | 98<br>(5.85)   | 11<br>(0.66)  | 1676<br>(100.00)  |
| 1 time/week ~ <1 time/day | <1 time/week              | 1 time/week ~ <1 time/day  | 99<br>(8.66)   | 519<br>(45.41) | 256<br>(22.40)  | 117<br>(10.24)  | 79 (6.91)       | 41 (3.59)       | 27<br>(2.36)   | 5<br>(0.44)   | 1143<br>(100.00)  |
| <1 time/week              | 1 time/week ~ <1 time/day | 1 time/week ~ <1 time/day  | 17<br>(6.94)   | 101<br>(41.22) | 62<br>(25.31)   | 25<br>(10.20)   | 22 (8.98)       | 10 (4.08)       | 8 (3.27)       | 0<br>(0.00)   | 245<br>(100.00)   |
| 1 time/week ~ <1 time/day | 1 time/week ~ <1 time/day | 1 time/week ~ <1 time/day  | 82<br>(7.31)   | 753<br>(67.17) | 134<br>(11.95)  | 69 (6.16)       | 44 (3.93)       | 28 (2.50)       | 9 (0.80)       | 2<br>(0.18)   | 1121<br>(100.00)  |
| ≥1 time/day               | <1 time/week              | <1 time/week               | 14<br>(0.10)   | 668<br>(4.60)  | 2783<br>(19.17) | 3463<br>(23.86) | 3668<br>(25.27) | 2564<br>(17.66) | 1159<br>(7.98) | 197<br>(1.36) | 14516<br>(100.00) |
| <1 time/week              | ≥1 time/day               | <1 time/week               | 2 (0.55)       | 52<br>(14.25)  | 52<br>(14.25)   | 100<br>(27.40)  | 86<br>(23.56)   | 59<br>(16.16)   | 14<br>(3.84)   | 0<br>(0.00)   | 365<br>(100.00)   |
| <1 time/week              | <1 time/week              | ≥1 time/day                | 14<br>(16.28)  | 48<br>(55.81)  | 13<br>(15.12)   | 4 (4.65)        | 4 (4.65)        | 3 (3.49)        | 0 (0.00)       | 0<br>(0.00)   | 86<br>(100.00)    |
| ≥1 time/day               | 1 time/week ~ <1 time/day | <1 time/week               | 3 (0.08)       | 266<br>(7.43)  | 740<br>(20.68)  | 1096<br>(30.63) | 866<br>(24.20)  | 463<br>(12.94)  | 123<br>(3.44)  | 21<br>(0.59)  | 3578<br>(100.00)  |
| ≥1 time/day               | <1 time/week              | 1 time/week ~ <1 time/day  | 30<br>(0.82)   | 690<br>(18.80) | 1264<br>(34.44) | 817<br>(22.26)  | 487<br>(13.27)  | 254<br>(6.92)   | 108<br>(2.94)  | 20<br>(0.54)  | 3670<br>(100.00)  |
| 1 time/week ~ <1 time/day | ≥1 time/day               | <1 time/week               | 2 (0.81)       | 60<br>(24.19)  | 34<br>(13.71)   | 51<br>(20.56)   | 56<br>(22.58)   | 33<br>(13.31)   | 12<br>(4.84)   | 0<br>(0.00)   | 248<br>(100.00)   |
| <1 time/week              | ≥1 time/day               | 1 time/week ~ <1 time/day  | 1 (1.22)       | 35<br>(42.68)  | 17<br>(20.73)   | 14<br>(17.07)   | 7 (8.54)        | 7 (8.54)        | 0 (0.00)       | 1<br>(1.22)   | 82<br>(100.00)    |
| 1 time/week ~ <1 time/day | <1 time/week              | ≥1 time/day                | 3 (4.41)       | 43<br>(63.24)  | 16<br>(23.53)   | 4 (5.88)        | 1 (1.47)        | 1 (1.47)        | 0 (0.00)       | 0<br>(0.00)   | 68<br>(100.00)    |
| <1 time/week              | 1 time/week ~ <1 time/day | ≥1 time/day                | 1 (6.25)       | 5<br>(31.25)   | 7 (43.75)       | 1 (6.25)        | 1 (6.25)        | 0 (0.00)        | 1 (6.25)       | 0<br>(0.00)   | 16<br>(100.00)    |

|                           |                           |                           |              |                |                |                |                |                |               |              |                  |
|---------------------------|---------------------------|---------------------------|--------------|----------------|----------------|----------------|----------------|----------------|---------------|--------------|------------------|
| ≥1 time/day               | 1 time/week ~ <1 time/day | 1 time/week ~ <1 time/day | 13<br>(0.82) | 472<br>(29.80) | 496<br>(31.31) | 346<br>(21.84) | 170<br>(10.73) | 63 (3.98)      | 21<br>(1.33)  | 3<br>(0.19)  | 1584<br>(100.00) |
| 1 time/week ~ <1 time/day | ≥1 time/day               | 1 time/week ~ <1 time/day | 13<br>(8.84) | 84<br>(57.14)  | 28<br>(19.05)  | 13 (8.84)      | 5 (3.40)       | 2 (1.36)       | 2 (1.36)      | 0<br>(0.00)  | 147<br>(100.00)  |
| 1 time/week ~ <1 time/day | 1 time/week ~ <1 time/day | ≥1 time/day               | 7<br>(13.46) | 37<br>(71.15)  | 7 (13.46)      | 0 (0.00)       | 1 (1.92)       | 0 (0.00)       | 0 (0.00)      | 0<br>(0.00)  | 52<br>(100.00)   |
| ≥1 time/day               | ≥1 time/day               | <1 time/week              | 3 (0.12)     | 154<br>(6.10)  | 517<br>(20.47) | 785<br>(31.08) | 640<br>(25.34) | 302<br>(11.96) | 105<br>(4.16) | 20<br>(0.79) | 2526<br>(100.00) |
| ≥1 time/day               | <1 time/week              | ≥1 time/day               | 8 (2.45)     | 102<br>(31.19) | 108<br>(33.03) | 57<br>(17.43)  | 33<br>(10.09)  | 13 (3.98)      | 4 (1.22)      | 2<br>(0.61)  | 327<br>(100.00)  |
| <1 time/week              | ≥1 time/day               | ≥1 time/day               | 0 (0.00)     | 7<br>(70.00)   | 2 (20.00)      | 1 (10.00)      | 0 (0.00)       | 0 (0.00)       | 0 (0.00)      | 0<br>(0.00)  | 10<br>(100.00)   |
| ≥1 time/day               | ≥1 time/day               | 1 time/week ~ <1 time/day | 6 (0.68)     | 188<br>(21.29) | 324<br>(36.69) | 221<br>(25.03) | 101<br>(11.44) | 30 (3.40)      | 11<br>(1.25)  | 2<br>(0.23)  | 883<br>(100.00)  |
| ≥1 time/day               | 1 time/week ~ <1 time/day | ≥1 time/day               | 6 (5.94)     | 47<br>(46.53)  | 28<br>(27.72)  | 15<br>(14.85)  | 3 (2.97)       | 2 (1.98)       | 0 (0.00)      | 0<br>(0.00)  | 101<br>(100.00)  |
| 1 time/week ~ <1 time/day | ≥1 time/day               | ≥1 time/day               | 1<br>(11.11) | 7<br>(77.78)   | 1 (11.11)      | 0 (0.00)       | 0 (0.00)       | 0 (0.00)       | 0 (0.00)      | 0<br>(0.00)  | 9 (100.00)       |
| ≥1 time/day               | ≥1 time/day               | ≥1 time/day               | 1 (1.37)     | 31<br>(42.47)  | 21<br>(28.77)  | 13<br>(17.81)  | 5 (6.85)       | 1 (1.37)       | 1 (1.37)      | 0<br>(0.00)  | 73<br>(100.00)   |



**Table S9.** Multivariable logistic regression for hypertension according to the frequency of intake of coffee, tea, and carbonated beverages (age  $\geq 20$  and  $< 60$  years)

|                                   | Crude               | Model 1             | Model 2             | Model 3             |
|-----------------------------------|---------------------|---------------------|---------------------|---------------------|
| <b>Men</b>                        |                     |                     |                     |                     |
| <b>Coffee intake</b>              |                     |                     |                     |                     |
| <1 time/week                      | reference           | reference           | reference           | reference           |
| 1 time/week ~ <1 time/day         | 0.58 (0.46 to 0.74) | 0.85 (0.65 to 1.12) | 0.83 (0.63 to 1.09) | 0.73 (0.55 to 0.98) |
| $\geq 1$ time/day                 | 1.13 (0.93 to 1.36) | 0.78 (0.63 to 0.97) | 0.75 (0.61 to 0.94) | 0.70 (0.56 to 0.89) |
| <b>Tea intake</b>                 |                     |                     |                     |                     |
| <1 time/week                      | reference           | reference           | reference           | reference           |
| 1 time/week ~ <1 time/day         | 0.86 (0.74 to 1.01) | 1.35 (1.14 to 1.61) | 1.35 (1.13 to 1.61) | 1.38 (1.14 to 1.66) |
| $\geq 1$ time/day                 | 2.48 (2.04 to 3.02) | 2.72 (2.18 to 3.39) | 2.74 (2.19 to 3.42) | 2.85 (2.25 to 3.60) |
| <b>Carbonated beverage intake</b> |                     |                     |                     |                     |
| <1 time/week                      | reference           | reference           | reference           | reference           |
| 1 time/week ~ <1 time/day         | 0.41 (0.36 to 0.48) | 1.09 (0.92 to 1.29) | 1.07 (0.90 to 1.28) | 1.05 (0.88 to 1.27) |
| $\geq 1$ time/day                 | 0.23 (0.14 to 0.38) | 0.81 (0.46 to 1.42) | 0.84 (0.47 to 1.47) | 0.85 (0.48 to 1.51) |
| <b>Women</b>                      |                     |                     |                     |                     |
| <b>Coffee intake</b>              |                     |                     |                     |                     |
| <1 time/week                      | reference           | reference           | reference           | reference           |
| 1 time/week ~ <1 time/day         | 0.65 (0.53 to 0.79) | 1.04 (0.83 to 1.31) | 0.98 (0.78 to 1.24) | 0.95 (0.74 to 1.22) |
| $\geq 1$ time/day                 | 1.00 (0.86 to 1.17) | 0.96 (0.80 to 1.14) | 0.91 (0.76 to 1.08) | 0.95 (0.79 to 1.16) |
| <b>Tea intake</b>                 |                     |                     |                     |                     |
| <1 time/week                      | reference           | reference           | reference           | reference           |
| 1 time/week ~ <1 time/day         | 0.99 (0.85 to 1.14) | 1.52 (1.28 to 1.80) | 1.51 (1.27 to 1.79) | 1.69 (1.41 to 2.03) |
| $\geq 1$ time/day                 | 2.03 (1.64 to 2.51) | 2.43 (1.88 to 3.15) | 2.44 (1.88 to 3.16) | 2.64 (2.00 to 3.48) |
| <b>Carbonated beverage intake</b> |                     |                     |                     |                     |
| <1 time/week                      | reference           | reference           | reference           | reference           |
| 1 time/week ~ <1 time/day         | 0.40 (0.33 to 0.47) | 1.27 (1.03 to 1.57) | 1.23 (1.00 to 1.52) | 1.09 (0.87 to 1.36) |
| $\geq 1$ time/day                 | 0.40 (0.21 to 0.78) | 1.37 (0.62 to 3.02) | 1.34 (0.61 to 2.94) | 1.18 (0.51 to 2.73) |

Data are presented as odds ratio (95% confidence interval).

Model 1: Adjusted for age.

Model 2: Adjusted for age, the frequency of intake of coffee, tea, and carbonated beverages.

Model 3: Adjusted for age, the frequency of intake of coffee, tea, and carbonated beverages, daily nutritional intake (total and fat), average monthly household income, education level, smoking, alcohol drinking, walking, body mass index status, and menopause status (only in women).

**Table S10.** Multivariable logistic regression for diabetes according to the frequency of intake of coffee, tea, and carbonated beverages (age  $\geq 20$  and  $< 60$  years)

|                                   | Crude               | Model 1             | Model 2             | Model 3             |
|-----------------------------------|---------------------|---------------------|---------------------|---------------------|
| <b>Men</b>                        |                     |                     |                     |                     |
| <b>Coffee intake</b>              |                     |                     |                     |                     |
| <1 time/week                      | reference           | reference           | reference           | reference           |
| 1 time/week ~ <1 time/day         | 0.63 (0.45 to 0.87) | 0.99 (0.69 to 1.43) | 1.02 (0.71 to 1.48) | 1.00 (0.67 to 1.47) |
| $\geq 1$ time/day                 | 1.00 (0.77 to 1.31) | 0.72 (0.54 to 0.96) | 0.72 (0.54 to 0.96) | 0.69 (0.50 to 0.95) |
| <b>Tea intake</b>                 |                     |                     |                     |                     |
| <1 time/week                      | reference           | reference           | reference           | reference           |
| 1 time/week ~ <1 time/day         | 0.99 (0.80 to 1.24) | 1.62 (1.28 to 2.06) | 1.62 (1.28 to 2.07) | 1.90 (1.46 to 2.46) |
| $\geq 1$ time/day                 | 2.68 (2.06 to 3.48) | 2.97 (2.23 to 3.96) | 3.04 (2.28 to 4.06) | 4.21 (3.09 to 5.72) |
| <b>Carbonated beverage intake</b> |                     |                     |                     |                     |
| <1 time/week                      | reference           | reference           | reference           | reference           |
| 1 time/week ~ <1 time/day         | 0.29 (0.23 to 0.37) | 0.85 (0.66 to 1.11) | 0.84 (0.65 to 1.10) | 0.83 (0.63 to 1.10) |
| $\geq 1$ time/day                 | 0.23 (0.11 to 0.49) | 0.91 (0.41 to 2.04) | 0.98 (0.44 to 2.20) | 0.79 (0.34 to 1.83) |
| <b>Women</b>                      |                     |                     |                     |                     |
| <b>Coffee intake</b>              |                     |                     |                     |                     |
| <1 time/week                      | reference           | reference           | reference           | reference           |
| 1 time/week ~ <1 time/day         | 0.46 (0.35 to 0.62) | 0.66 (0.48 to 0.89) | 0.62 (0.46 to 0.85) | 0.62 (0.45 to 0.87) |
| $\geq 1$ time/day                 | 0.58 (0.47 to 0.72) | 0.52 (0.41 to 0.65) | 0.49 (0.39 to 0.62) | 0.58 (0.46 to 0.75) |
| <b>Tea intake</b>                 |                     |                     |                     |                     |
| <1 time/week                      | reference           | reference           | reference           | reference           |
| 1 time/week ~ <1 time/day         | 0.96 (0.76 to 1.23) | 1.40 (1.08 to 1.80) | 1.42 (1.10 to 1.83) | 1.62 (1.24 to 2.12) |
| $\geq 1$ time/day                 | 2.18 (1.57 to 3.02) | 2.59 (1.83 to 3.66) | 2.77 (1.95 to 3.93) | 2.90 (2.00 to 4.20) |
| <b>Carbonated beverage intake</b> |                     |                     |                     |                     |
| <1 time/week                      | reference           | reference           | reference           | reference           |
| 1 time/week ~ <1 time/day         | 0.46 (0.35 to 0.61) | 1.17 (0.86 to 1.58) | 1.19 (0.88 to 1.62) | 1.00 (0.72 to 1.38) |
| $\geq 1$ time/day                 | 0.92 (0.42 to 1.99) | 2.61 (1.12 to 6.07) | 2.68 (1.16 to 6.21) | 1.97 (0.82 to 4.75) |

Data are presented as odds ratio (95% confidence interval).

Model 1: Adjusted for age.

Model 2: Adjusted for age, the frequency of intake of coffee, tea, and carbonated beverages.

Model 3: Adjusted for age, the frequency of intake of coffee, tea, and carbonated beverages, daily nutritional intake (total and fat), average monthly household income, education level, smoking, alcohol drinking, walking, body mass index status, and menopause status (only in women).

**Table S11.** Multivariable logistic regression for dyslipidemia according to the frequency of intake of coffee, tea, and carbonated beverages (age  $\geq 20$  and  $< 60$  years)

|                                   | Crude               | Model 1             | Model 2             | Model 3              |
|-----------------------------------|---------------------|---------------------|---------------------|----------------------|
| <b>Men</b>                        |                     |                     |                     |                      |
| <b>Coffee intake</b>              |                     |                     |                     |                      |
| <1 time/week                      | reference           | reference           | reference           | reference            |
| 1 time/week ~ <1 time/day         | 0.59 (0.44 to 0.78) | 0.81 (0.60 to 1.10) | 0.78 (0.57 to 1.06) | 0.73 (0.53 to 1.001) |
| $\geq 1$ time/day                 | 1.12 (0.89 to 1.40) | 0.82 (0.65 to 1.04) | 0.80 (0.62 to 1.02) | 0.73 (0.57 to 0.95)  |
| <b>Tea intake</b>                 |                     |                     |                     |                      |
| <1 time/week                      | reference           | reference           | reference           | reference            |
| 1 time/week ~ <1 time/day         | 0.94 (0.78 to 1.12) | 1.39 (1.14 to 1.68) | 1.40 (1.15 to 1.71) | 1.49 (1.22 to 1.83)  |
| $\geq 1$ time/day                 | 2.37 (1.89 to 2.97) | 2.51 (1.98 to 3.20) | 2.52 (1.98 to 3.21) | 2.61 (2.03 to 3.36)  |
| <b>Carbonated beverage intake</b> |                     |                     |                     |                      |
| <1 time/week                      | reference           | reference           | reference           | reference            |
| 1 time/week ~ <1 time/day         | 0.46 (0.39 to 0.54) | 1.04 (0.86 to 1.26) | 1.03 (0.84 to 1.25) | 1.02 (0.83 to 1.25)  |
| $\geq 1$ time/day                 | 0.32 (0.19 to 0.56) | 0.96 (0.54 to 1.71) | 1.01 (0.56 to 1.81) | 1.03 (0.57 to 1.86)  |
| <b>Women</b>                      |                     |                     |                     |                      |
| <b>Coffee intake</b>              |                     |                     |                     |                      |
| <1 time/week                      | reference           | reference           | reference           | reference            |
| 1 time/week ~ <1 time/day         | 0.55 (0.44 to 0.69) | 0.82 (0.64 to 1.05) | 0.79 (0.61 to 1.01) | 0.78 (0.60 to 1.01)  |
| $\geq 1$ time/day                 | 0.98 (0.83 to 1.16) | 0.90 (0.75 to 1.09) | 0.87 (0.72 to 1.05) | 0.95 (0.78 to 1.16)  |
| <b>Tea intake</b>                 |                     |                     |                     |                      |
| <1 time/week                      | reference           | reference           | reference           | reference            |
| 1 time/week ~ <1 time/day         | 0.98 (0.84 to 1.16) | 1.52 (1.26 to 1.82) | 1.53 (1.27 to 1.84) | 1.61 (1.33 to 1.95)  |
| $\geq 1$ time/day                 | 1.88 (1.49 to 2.39) | 2.36 (1.79 to 3.11) | 2.37 (1.80 to 3.13) | 2.35 (1.76 to 3.14)  |
| <b>Carbonated beverage intake</b> |                     |                     |                     |                      |
| <1 time/week                      | reference           | reference           | reference           | reference            |
| 1 time/week ~ <1 time/day         | 0.36 (0.29 to 0.44) | 1.09 (0.87 to 1.38) | 1.07 (0.85 to 1.35) | 0.95 (0.75 to 1.21)  |
| $\geq 1$ time/day                 | 0.61 (0.33 to 1.12) | 2.28 (1.09 to 4.77) | 2.31 (1.11 to 4.80) | 1.81 (0.85 to 3.85)  |

Data are presented as odds ratio (95% confidence interval).

Model 1: Adjusted for age.

Model 2: Adjusted for age, the frequency of intake of coffee, tea, and carbonated beverages.

Model 3: Adjusted for age, the frequency of intake of coffee, tea, and carbonated beverages, daily nutritional intake (total and fat), average monthly household income, education level, smoking, alcohol drinking, walking, body mass index status, and menopause status (only in women).

**Table S12.** Multivariable logistic regression for metabolic syndrome according to the frequency of intake of coffee, tea, and carbonated beverages (age  $\geq 20$  and  $< 60$  years)

|                                   | Crude               | Model 1             | Model 2              | Model 3             |
|-----------------------------------|---------------------|---------------------|----------------------|---------------------|
| <b>Men</b>                        |                     |                     |                      |                     |
| <b>Coffee intake</b>              |                     |                     |                      |                     |
| <1 time/week                      | reference           | reference           | reference            | reference           |
| 1 time/week ~ <1 time/day         | 0.87 (0.74 to 1.02) | 0.96 (0.82 to 1.14) | 0.94 (0.80 to 1.12)  | 0.88 (0.72 to 1.06) |
| $\geq 1$ time/day                 | 1.28 (1.13 to 1.46) | 1.09 (0.96 to 1.25) | 1.08 (0.94 to 1.23)  | 0.92 (0.79 to 1.08) |
| <b>Tea intake</b>                 |                     |                     |                      |                     |
| <1 time/week                      | reference           | reference           | reference            | reference           |
| 1 time/week ~ <1 time/day         | 0.96 (0.87 to 1.06) | 1.10 (0.99 to 1.21) | 1.11 (1.001 to 1.23) | 1.02 (0.90 to 1.15) |
| $\geq 1$ time/day                 | 1.20 (1.06 to 1.36) | 1.19 (1.05 to 1.35) | 1.18 (1.04 to 1.34)  | 1.04 (0.90 to 1.20) |
| <b>Carbonated beverage intake</b> |                     |                     |                      |                     |
| <1 time/week                      | reference           | reference           | reference            | reference           |
| 1 time/week ~ <1 time/day         | 0.70 (0.64 to 0.77) | 1.04 (0.94 to 1.15) | 1.03 (0.93 to 1.14)  | 1.03 (0.92 to 1.16) |
| $\geq 1$ time/day                 | 0.70 (0.54 to 0.90) | 1.22 (0.94 to 1.59) | 1.21 (0.93 to 1.58)  | 1.10 (0.81 to 1.49) |
| <b>Women</b>                      |                     |                     |                      |                     |
| <b>Coffee intake</b>              |                     |                     |                      |                     |
| <1 time/week                      | reference           | reference           | reference            | reference           |
| 1 time/week ~ <1 time/day         | 0.93 (0.80 to 1.07) | 1.09 (0.93 to 1.27) | 1.08 (0.93 to 1.26)  | 1.02 (0.85 to 1.21) |
| $\geq 1$ time/day                 | 1.05 (0.93 to 1.17) | 0.94 (0.83 to 1.06) | 0.92 (0.82 to 1.04)  | 0.82 (0.72 to 0.95) |
| <b>Tea intake</b>                 |                     |                     |                      |                     |
| <1 time/week                      | reference           | reference           | reference            | reference           |
| 1 time/week ~ <1 time/day         | 0.80 (0.72 to 0.89) | 0.93 (0.83 to 1.04) | 0.91 (0.81 to 1.01)  | 0.97 (0.85 to 1.10) |
| $\geq 1$ time/day                 | 0.97 (0.84 to 1.12) | 1.03 (0.89 to 1.20) | 1.04 (0.90 to 1.21)  | 1.06 (0.90 to 1.26) |
| <b>Carbonated beverage intake</b> |                     |                     |                      |                     |
| <1 time/week                      | reference           | reference           | reference            | reference           |
| 1 time/week ~ <1 time/day         | 0.74 (0.66 to 0.83) | 1.42 (1.25 to 1.61) | 1.43 (1.26 to 1.62)  | 1.20 (1.04 to 1.38) |
| $\geq 1$ time/day                 | 0.88 (0.59 to 1.31) | 2.06 (1.35 to 3.16) | 2.08 (1.36 to 3.18)  | 2.05 (1.28 to 3.29) |

Data are presented as odds ratio (95% confidence interval).

Model 1: Adjusted for age.

Model 2: Adjusted for age, the frequency of intake of coffee, tea, and carbonated beverages.

Model 3: Adjusted for age, the frequency of intake of coffee, tea, and carbonated beverages, daily nutritional intake (total and fat), average monthly household income, education level, smoking, alcohol drinking, walking, body mass index status, and menopause status (only in women).

**Table S13.** Multivariable logistic regression for hypertension when the frequency of intake is categorized into four groups

|                                   | Crude                | Model 1             | Model 2             | Model 3             |
|-----------------------------------|----------------------|---------------------|---------------------|---------------------|
| <b>Men</b>                        |                      |                     |                     |                     |
| <b>Coffee intake</b>              |                      |                     |                     |                     |
| <1 time/week                      | reference            | reference           | reference           | reference           |
| 1 time/week ~ <1 time/day         | 0.53 (0.43 to 0.64)  | 0.77 (0.58 to 1.01) | 0.74 (0.56 to 0.98) | 0.66 (0.49 to 0.90) |
| 1 time/day ~ <2 times/day         | 1.42 (1.16 to 1.75)  | 1.04 (0.80 to 1.35) | 0.99 (0.75 to 1.30) | 0.99 (0.74 to 1.32) |
| ≥2 times/day                      | 1.02 (0.86 to 1.21)  | 0.62 (0.49 to 0.77) | 0.60 (0.48 to 0.76) | 0.57 (0.44 to 0.73) |
| <b>Green tea intake</b>           |                      |                     |                     |                     |
| <6–11 times/year                  | reference            | reference           | reference           | reference           |
| 6–11 times/year ~ <1 time/week    | 1.01 (0.85 to 1.19)  | 1.15 (0.94 to 1.41) | 1.11 (0.90 to 1.36) | 1.14 (0.92 to 1.42) |
| 1 time/week ~ <1 time/day         | 0.75 (0.65 to 0.87)  | 1.42 (1.16 to 1.72) | 1.37 (1.12 to 1.67) | 1.47 (1.20 to 1.80) |
| ≥1 time/day                       | 1.93 (1.58 to 2.36)  | 2.49 (1.94 to 3.19) | 2.48 (1.93 to 3.20) | 2.66 (2.05 to 3.45) |
| <b>Carbonated beverage intake</b> |                      |                     |                     |                     |
| <1 time/month                     | reference            | reference           | reference           | reference           |
| 1 time/month ~ <1 time/week       | 0.45 (0.39 to 0.52)  | 1.02 (0.85 to 1.22) | 1.04 (0.86 to 1.25) | 1.07 (0.88 to 1.30) |
| 1 time/week ~ <1 time/day         | 0.23 (0.20 to 0.27)  | 1.13 (0.91 to 1.40) | 1.12 (0.91 to 1.39) | 1.11 (0.89 to 1.39) |
| ≥1 time/day                       | 0.13 (0.078 to 0.23) | 1.02 (0.53 to 1.99) | 1.02 (0.51 to 2.03) | 1.08 (0.55 to 2.12) |
| <b>Women</b>                      |                      |                     |                     |                     |
| <b>Coffee intake</b>              |                      |                     |                     |                     |
| <1 time/week                      | reference            | reference           | reference           | reference           |
| 1 time/week ~ <1 time/day         | 0.49 (0.42 to 0.57)  | 1.10 (0.87 to 1.37) | 1.02 (0.82 to 1.27) | 0.98 (0.77 to 1.24) |
| 1 time/day ~ <2 times/day         | 1.01 (0.87 to 1.16)  | 1.24 (1.02 to 1.51) | 1.15 (0.94 to 1.40) | 1.18 (0.95 to 1.46) |
| ≥2 times/day                      | 0.59 (0.52 to 0.68)  | 0.79 (0.66 to 0.95) | 0.74 (0.61 to 0.89) | 0.77 (0.63 to 0.94) |
| <b>Green tea intake</b>           |                      |                     |                     |                     |
| <6–11 times/year                  | reference            | reference           | reference           | reference           |
| 6–11 times/year ~ <1 time/week    | 1.01 (0.88 to 1.16)  | 1.20 (0.99 to 1.45) | 1.18 (0.98 to 1.42) | 1.27 (1.04 to 1.57) |
| 1 time/week ~ <1 time/day         | 0.68 (0.59 to 0.77)  | 1.46 (1.20 to 1.77) | 1.44 (1.18 to 1.75) | 1.65 (1.35 to 2.01) |
| ≥1 time/day                       | 1.47 (1.18 to 1.83)  | 2.88 (2.12 to 3.92) | 2.83 (2.08 to 3.85) | 3.20 (2.28 to 4.49) |
| <b>Carbonated beverage intake</b> |                      |                     |                     |                     |
| <1 time/month                     | reference            | reference           | reference           | reference           |
| 1 time/month ~ <1 time/week       | 0.41 (0.36 to 0.46)  | 1.16 (0.97 to 1.40) | 1.19 (0.99 to 1.43) | 1.14 (0.94 to 1.38) |
| 1 time/week ~ <1 time/day         | 0.19 (0.16 to 0.22)  | 1.35 (1.06 to 1.72) | 1.32 (1.03 to 1.69) | 1.16 (0.89 to 1.50) |
| ≥1 time/day                       | 0.28 (0.15 to 0.53)  | 2.77 (1.20 to 6.41) | 2.53 (1.13 to 1.18) | 2.36 (0.87 to 6.38) |

Data are presented as odds ratio (95% confidence interval).

Model 1: Adjusted for age.

Model 2: Adjusted for age, the frequency of intake of coffee, tea, and carbonated beverages.

Model 3: Adjusted for age, the frequency of intake of coffee, tea, and carbonated beverages, daily nutritional intake (total and fat), average monthly household income, education level, smoking, alcohol drinking, walking, body mass index status, and menopause status (only in women).

**Table S14.** Multivariable logistic regression for diabetes when the frequency of intake is categorized into four groups

|                                   | Crude                | Model 1              | Model 2              | Model 3              |
|-----------------------------------|----------------------|----------------------|----------------------|----------------------|
| <b>Men</b>                        |                      |                      |                      |                      |
| <b>Coffee intake</b>              |                      |                      |                      |                      |
| <1 time/week                      | reference            | reference            | reference            | reference            |
| 1 time/week ~ <1 time/day         | 0.54 (0.40 to 0.72)  | 0.82 (0.56 to 1.21)  | 0.84 (0.57 to 1.24)  | 0.89 (0.60 to 1.31)  |
| 1 time/day ~ <2 times/day         | 1.24 (0.94 to 1.62)  | 0.94 (0.66 to 1.34)  | 0.92 (0.65 to 1.31)  | 1.01 (0.71 to 1.45)  |
| ≥2 times/day                      | 0.82 (0.63 to 1.05)  | 0.50 (0.36 to 0.68)  | 0.51 (0.37 to 0.70)  | 0.54 (0.39 to 0.74)  |
| <b>Green tea intake</b>           |                      |                      |                      |                      |
| <6–11 times/year                  | reference            | reference            | reference            | reference            |
| 6–11 times/year ~ <1 time/week    | 0.97 (0.77 to 1.23)  | 1.09 (0.84 to 1.42)  | 1.04 (0.79 to 1.36)  | 1.22 (0.91 to 1.63)  |
| 1 time/week ~ <1 time/day         | 0.82 (0.66 to 1.002) | 1.59 (1.23 to 2.06)  | 1.52 (1.17 to 1.97)  | 1.88 (1.40 to 2.52)  |
| ≥1 time/day                       | 2.21 (1.71 to 2.84)  | 2.71 (2.00 to 3.66)  | 2.65 (1.96 to 3.60)  | 3.72 (2.68 to 5.16)  |
| <b>Carbonated beverage intake</b> |                      |                      |                      |                      |
| <1 time/month                     | reference            | reference            | reference            | reference            |
| 1 time/month ~ <1 time/week       | 0.42 (0.35 to 0.52)  | 1.07 (0.85 to 1.36)  | 1.11 (0.87 to 1.41)  | 1.12 (0.87 to 1.45)  |
| 1 time/week ~ <1 time/day         | 0.17 (0.13 to 0.21)  | 0.91 (0.69 to 1.20)  | 0.93 (0.71 to 1.23)  | 0.93 (0.69 to 1.25)  |
| ≥1 time/day                       | 0.15 (0.073 to 0.32) | 1.25 (0.54 to 2.91)  | 1.23 (0.53 to 2.88)  | 1.19 (0.49 to 2.86)  |
| <b>Women</b>                      |                      |                      |                      |                      |
| <b>Coffee intake</b>              |                      |                      |                      |                      |
| <1 time/week                      | reference            | reference            | reference            | reference            |
| 1 time/week ~ <1 time/day         | 0.43 (0.35 to 0.53)  | 0.72 (0.56 to 0.94)  | 0.68 (0.52 to 0.89)  | 0.65 (0.49 to 0.87)  |
| 1 time/day ~ <2 times/day         | 0.81 (0.66 to 0.997) | 0.84 (0.66 to 1.07)  | 0.79 (0.62 to 1.01)  | 0.87 (0.67 to 1.14)  |
| ≥2 times/day                      | 0.34 (0.27 to 0.42)  | 0.36 (0.28 to 0.46)  | 0.33 (0.25 to 0.42)  | 0.37 (0.28 to 0.49)  |
| <b>Green tea intake</b>           |                      |                      |                      |                      |
| <6–11 times/year                  | reference            | reference            | reference            | reference            |
| 6–11 times/year ~ <1 time/week    | 1.07 (0.87 to 1.33)  | 1.22 (0.95 to 1.56)  | 1.21 (0.93 to 1.56)  | 1.31 (0.99 to 1.72)  |
| 1 time/week ~ <1 time/day         | 0.69 (0.57 to 0.85)  | 1.33 (1.05 to 1.69)  | 1.35 (1.06 to 1.73)  | 1.63 (1.26 to 2.11)  |
| ≥1 time/day                       | 1.55 (1.14 to 2.11)  | 2.82 (1.96 to 4.05)  | 3.01 (2.09 to 4.34)  | 3.35 (2.29 to 4.89)  |
| <b>Carbonated beverage intake</b> |                      |                      |                      |                      |
| <1 time/month                     | reference            | reference            | reference            | reference            |
| 1 time/month ~ <1 time/week       | 0.37 (0.30 to 0.45)  | 0.999 (0.78 to 1.28) | 1.10 (0.85 to 1.41)  | 1.10 (0.84 to 1.45)  |
| 1 time/week ~ <1 time/day         | 0.20 (0.15 to 0.26)  | 1.31 (0.94 to 1.83)  | 1.45 (1.02 to 2.05)  | 1.26 (0.88 to 1.80)  |
| ≥1 time/day                       | 0.59 (0.25 to 1.34)  | 5.87 (1.74 to 19.78) | 5.82 (1.89 to 17.91) | 4.29 (1.32 to 13.91) |

Data are presented as odds ratio (95% confidence interval).

Model 1: Adjusted for age.

Model 2: Adjusted for age, the frequency of intake of coffee, tea, and carbonated beverages.

Model 3: Adjusted for age, the frequency of intake of coffee, tea, and carbonated beverages, daily nutritional intake (total and fat), average monthly household income, education level, smoking, alcohol drinking, walking, body mass index status, and menopause status (only in women).

**Table S15.** Multivariable logistic regression for dyslipidemia when the frequency of intake is categorized into four groups

|                                   | Crude               | Model 1               | Model 2               | Model 3             |
|-----------------------------------|---------------------|-----------------------|-----------------------|---------------------|
| <b>Men</b>                        |                     |                       |                       |                     |
| <b>Coffee intake</b>              |                     |                       |                       |                     |
| <1 time/week                      | reference           | reference             | reference             | reference           |
| 1 time/week ~ <1 time/day         | 0.52 (0.39 to 0.68) | 0.71 (0.52 to 0.95)   | 0.67 (0.49 to 0.91)   | 0.62 (0.46 to 0.85) |
| 1 time/day ~ <2 times/day         | 1.15 (0.88 to 1.49) | 0.90 (0.67 to 1.20)   | 0.85 (0.64 to 1.14)   | 0.82 (0.61 to 1.11) |
| ≥2 times/day                      | 1.09 (0.88 to 1.35) | 0.68 (0.54 to 0.87)   | 0.67 (0.52 to 0.86)   | 0.60 (0.46 to 0.78) |
| <b>Green tea intake</b>           |                     |                       |                       |                     |
| <6–11 times/year                  | reference           | reference             | reference             | reference           |
| 6–11 times/year ~ <1 time/week    | 1.28 (1.04 to 1.58) | 1.40 (1.11 to 1.77)   | 1.36 (1.08 to 1.71)   | 1.37 (1.07 to 1.75) |
| 1 time/week ~ <1 time/day         | 0.92 (0.77 to 1.11) | 1.50 (1.22 to 1.85)   | 1.50 (1.21 to 1.84)   | 1.66 (1.34 to 2.07) |
| ≥1 time/day                       | 2.37 (1.85 to 3.04) | 2.71 (2.03 to 3.62)   | 2.69 (2.02 to 3.60)   | 2.77 (2.07 to 3.71) |
| <b>Carbonated beverage intake</b> |                     |                       |                       |                     |
| <1 time/month                     | reference           | reference             | reference             | reference           |
| 1 time/month ~ <1 time/week       | 0.57 (0.47 to 0.68) | 1.18 (0.96 to 1.46)   | 1.19 (0.97 to 1.46)   | 1.23 (0.99 to 1.53) |
| 1 time/week ~ <1 time/day         | 0.32 (0.26 to 0.38) | 1.17 (0.92 to 1.48)   | 1.15 (0.91 to 1.46)   | 1.19 (0.94 to 1.52) |
| ≥1 time/day                       | 0.19 (0.11 to 0.35) | 0.97 (0.51 to 1.84)   | 1.02 (0.52 to 1.99)   | 1.10 (0.57 to 2.14) |
| <b>Women</b>                      |                     |                       |                       |                     |
| <b>Coffee intake</b>              |                     |                       |                       |                     |
| <1 time/week                      | reference           | reference             | reference             | reference           |
| 1 time/week ~ <1 time/day         | 0.55 (0.45 to 0.65) | 0.93 (0.74 to 1.16)   | 0.88 (0.70 to 1.11)   | 0.87 (0.69 to 1.09) |
| 1 time/day ~ <2 times/day         | 1.08 (0.91 to 1.27) | 1.10 (0.89 to 1.37)   | 1.05 (0.85 to 1.30)   | 1.08 (0.87 to 1.35) |
| ≥2 times/day                      | 0.80 (0.68 to 0.94) | 0.82 (0.67 to 0.997)  | 0.78 (0.64 to 0.96)   | 0.83 (0.68 to 1.02) |
| <b>Green tea intake</b>           |                     |                       |                       |                     |
| <6–11 times/year                  | reference           | reference             | reference             | reference           |
| 6–11 times/year ~ <1 time/week    | 1.18 (0.99 to 1.39) | 1.22 (0.9997 to 1.48) | 1.21 (0.99 to 1.48)   | 1.28 (1.04 to 1.57) |
| 1 time/week ~ <1 time/day         | 0.76 (0.65 to 0.89) | 1.39 (1.15 to 1.68)   | 1.39 (1.15 to 1.69)   | 1.49 (1.23 to 1.81) |
| ≥1 time/day                       | 1.40 (1.09 to 1.79) | 2.29 (1.67 to 3.13)   | 2.30 (1.69 to 3.15)   | 2.30 (1.67 to 3.16) |
| <b>Carbonated beverage intake</b> |                     |                       |                       |                     |
| <1 time/month                     | reference           | reference             | reference             | reference           |
| 1 time/month ~ <1 time/week       | 0.41 (0.35 to 0.47) | 1.13 (0.94 to 1.36)   | 1.15 (0.95 to 1.38)   | 1.15 (0.95 to 1.40) |
| 1 time/week ~ <1 time/day         | 0.18 (0.14 to 0.22) | 1.01 (0.78 to 1.29)   | 0.9999 (0.77 to 1.29) | 0.93 (0.72 to 1.21) |
| ≥1 time/day                       | 0.32 (0.16 to 0.63) | 3.28 (1.05 to 10.25)  | 3.27 (1.12 to 9.53)   | 2.72 (1.01 to 7.35) |

Data are presented as odds ratio (95% confidence interval).

Model 1: Adjusted for age.

Model 2: Adjusted for age, the frequency of intake of coffee, tea, and carbonated beverages.

Model 3: Adjusted for age, the frequency of intake of coffee, tea, and carbonated beverages, daily nutritional intake (total and fat), average monthly household income, education level, smoking, alcohol drinking, walking, body mass index status, and menopause status (only in women).

**Table S16.** Multivariable logistic regression for metabolic syndrome when the frequency of intake is categorized into four groups

|                                   | Crude                | Model 1             | Model 2               | Model 3              |
|-----------------------------------|----------------------|---------------------|-----------------------|----------------------|
| <b>Men</b>                        |                      |                     |                       |                      |
| <b>Coffee intake</b>              |                      |                     |                       |                      |
| <1 time/week                      | reference            | reference           | reference             | reference            |
| 1 time/week ~ <1 time/day         | 0.96 (0.82 to 1.13)  | 1.06 (0.90 to 1.26) | 1.06 (0.89 to 1.25)   | 1.00 (0.83 to 1.22)  |
| 1 time/day ~ <2 times/day         | 1.47 (1.27 to 1.72)  | 1.30 (1.12 to 1.52) | 1.28 (1.10 to 1.50)   | 1.19 (0.998 to 1.42) |
| ≥2 times/day                      | 1.58 (1.39 to 1.79)  | 1.35 (1.18 to 1.54) | 1.34 (1.18 to 1.53)   | 1.07 (0.92 to 1.24)  |
| <b>Green tea intake</b>           |                      |                     |                       |                      |
| <6–11 times/year                  | reference            | reference           | reference             | reference            |
| 6–11 times/year ~ <1 time/week    | 0.94 (0.84 to 1.06)  | 1.04 (0.92 to 1.17) | 1.06 (0.94 to 1.20)   | 1.01 (0.88 to 1.17)  |
| 1 time/week ~ <1 time/day         | 0.90 (0.81 to 1.004) | 1.09 (0.98 to 1.22) | 1.12 (0.9996 to 1.26) | 0.99 (0.86 to 1.14)  |
| ≥1 time/day                       | 1.20 (1.03 to 1.39)  | 1.29 (1.11 to 1.50) | 1.26 (1.09 to 1.47)   | 1.05 (0.88 to 1.25)  |
| <b>Carbonated beverage intake</b> |                      |                     |                       |                      |
| <1 time/month                     | reference            | reference           | reference             | reference            |
| 1 time/month ~ <1 time/week       | 0.73 (0.65 to 0.81)  | 0.96 (0.86 to 1.08) | 0.95 (0.85 to 1.07)   | 0.96 (0.84 to 1.09)  |
| 1 time/week ~ <1 time/day         | 0.58 (0.52 to 0.64)  | 0.99 (0.88 to 1.11) | 0.97 (0.86 to 1.08)   | 1.01 (0.88 to 1.15)  |
| ≥1 time/day                       | 0.49 (0.37 to 0.65)  | 0.97 (0.72 to 1.29) | 0.94 (0.70 to 1.26)   | 0.93 (0.66 to 1.31)  |
| <b>Women</b>                      |                      |                     |                       |                      |
| <b>Coffee intake</b>              |                      |                     |                       |                      |
| <1 time/week                      | reference            | reference           | reference             | reference            |
| 1 time/week ~ <1 time/day         | 0.74 (0.64 to 0.84)  | 1.03 (0.89 to 1.19) | 1.01 (0.87 to 1.17)   | 1.00 (0.85 to 1.18)  |
| 1 time/day ~ <2 times/day         | 1.004 (0.90 to 1.13) | 1.01 (0.89 to 1.14) | 0.98 (0.86 to 1.12)   | 0.98 (0.85 to 1.14)  |
| ≥2 times/day                      | 0.83 (0.74 to 0.93)  | 0.94 (0.83 to 1.05) | 0.91 (0.81 to 1.03)   | 0.85 (0.74 to 0.97)  |
| <b>Green tea intake</b>           |                      |                     |                       |                      |
| <6–11 times/year                  | reference            | reference           | reference             | reference            |
| 6–11 times/year ~ <1 time/week    | 0.85 (0.76 to 0.96)  | 0.99 (0.88 to 1.12) | 0.98 (0.86 to 1.10)   | 1.01 (0.88 to 1.16)  |
| 1 time/week ~ <1 time/day         | 0.64 (0.58 to 0.72)  | 0.93 (0.83 to 1.05) | 0.92 (0.82 to 1.03)   | 0.98 (0.86 to 1.12)  |
| ≥1 time/day                       | 0.88 (0.75 to 1.03)  | 1.15 (0.97 to 1.36) | 1.15 (0.97 to 1.36)   | 1.15 (0.95 to 1.39)  |
| <b>Carbonated beverage intake</b> |                      |                     |                       |                      |
| <1 time/month                     | reference            | reference           | reference             | reference            |
| 1 time/month ~ <1 time/week       | 0.71 (0.64 to 0.78)  | 1.23 (1.11 to 1.37) | 1.24 (1.11 to 1.38)   | 1.19 (1.05 to 1.34)  |
| 1 time/week ~ <1 time/day         | 0.50 (0.44 to 0.56)  | 1.42 (1.24 to 1.61) | 1.42 (1.25 to 1.62)   | 1.26 (1.09 to 1.46)  |
| ≥1 time/day                       | 0.57 (0.37 to 0.86)  | 1.96 (1.22 to 3.15) | 1.94 (1.20 to 3.12)   | 2.23 (1.43 to 3.49)  |

Data are presented as odds ratio (95% confidence interval).

Model 1: Adjusted for age.

Model 2: Adjusted for age, the frequency of intake of coffee, tea, and carbonated beverages.

Model 3: Adjusted for age, the frequency of intake of coffee, tea, and carbonated beverages, daily nutritional intake (total and fat), average monthly household income, education level, smoking, alcohol drinking, walking, body mass index status, and menopause status (only in women).
